# Supplementary material for: Salinity Affects Freshwater Invertebrate Traits and Litter Decomposition
Source: MDPI journal article supplement (doi:10.3390/d13110599), 2021-11-21
Supplement: s1 [file s1]

Archive with 5 entries (5 files):
- Figure S1.pdf
- Table S1.pdf
- Table S2.pdf
- Table S3.pdf
- Table S4.pdf
