# Supplementary material for: Salinity Affects Freshwater Invertebrate Traits and Litter Decomposition
Source: MDPI journal article supplement (doi:10.3390/d13110599), 2021-11-21
Supplement: s1 [file s1 › Figure S1.pdf]

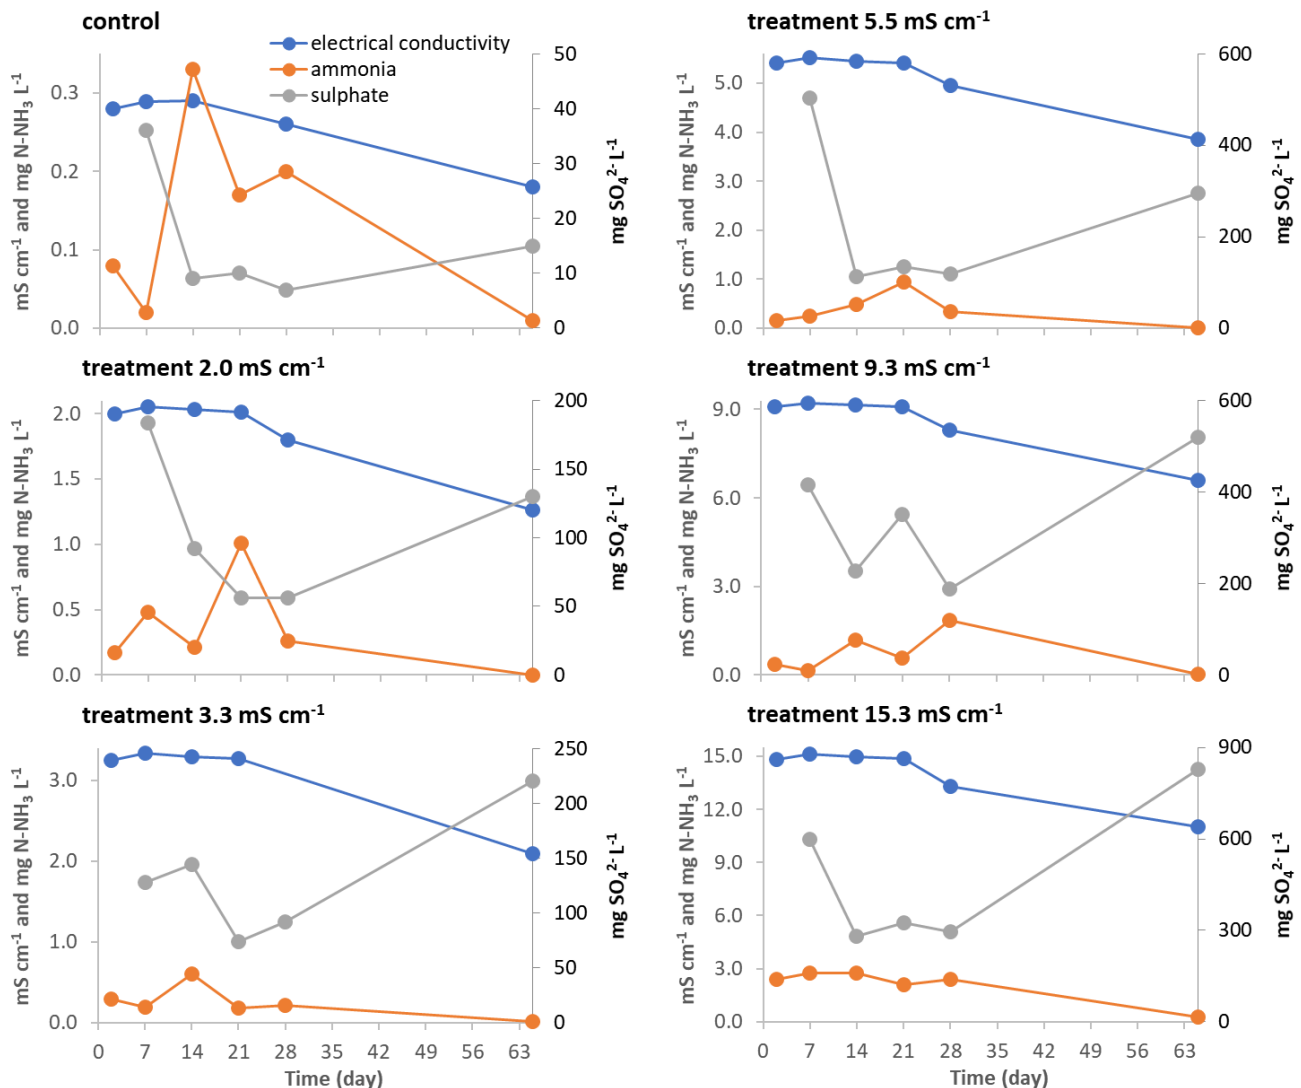

**Figure S1.** Temporal variation of the physicochemical values in each treatment during the 65 days after seawater intrusion (note the different scales of the Y-axis). There was a significant effect of treatment on the dependent multivariate variable (composed of electrical conductivity, ammonia and sulphate; Table S2 in Supplementary materials). Conductivity and ammonia decreased while sulphate increased along time, as denoted by the significant interaction between treatment and time (Table S2 in Supplementary materials).
