# Supplementary material for: Salinity Affects Freshwater Invertebrate Traits and Litter Decomposition
Source: MDPI journal article supplement (doi:10.3390/d13110599), 2021-11-21
Supplement: s1 [file s1 › Table S1.pdf]

## Supplementary materials

**Table S1.** Score (S) and frequency (F<sub>x</sub>) of the invertebrate trait categories (Tachet et al. 2000) used to characterize resilience, resistance, and avoidance to osmotic stress of each taxon. <sup>(i)</sup> Sum of the scores of the aquatic life stages for taxa with non-aquatic stages only.

| Attribute                     | Resilience |                |               |                |             |                | Resistance        |                | Avoidance                          |                |                          |                |
|-------------------------------|------------|----------------|---------------|----------------|-------------|----------------|-------------------|----------------|------------------------------------|----------------|--------------------------|----------------|
| Trait                         | Lifespan   |                | Reproduction  |                | Respiration |                | Generations /year |                | Aquatic life stages <sup>(i)</sup> |                | Reproduction Terrestrial |                |
| Category                      | < 1 year   |                | Ovoviviparous |                | Aerial      |                | >1                |                |                                    |                |                          |                |
| Taxon                         | S          | F <sub>x</sub> | S             | F <sub>x</sub> | S           | F <sub>x</sub> | S                 | F <sub>x</sub> | S                                  | F <sub>x</sub> | S                        | F <sub>x</sub> |
| <b>Gastropoda</b>             |            |                |               |                |             |                |                   |                |                                    |                |                          |                |
| Physidae                      | 3          | 0.75           | 0             | 0              | 0           | 0              | 0                 | 0              | 0                                  | 0              | 0                        | 0              |
| <b>Insecta: Ephemeroptera</b> |            |                |               |                |             |                |                   |                |                                    |                |                          |                |
| Baetidae                      | 3          | 1.00           | 3             | 0.60           | 0           | 0              | 3                 | 1.00           | 6                                  | 1.00           | 0                        | 0              |
| Caenidae                      | 3          | 1.00           | 0             | 0              | 0           | 0              | 3                 | 1.00           | 6                                  | 1.00           | 0                        | 0              |
| <b>Insecta: Odonata</b>       |            |                |               |                |             |                |                   |                |                                    |                |                          |                |
| Coenagrionidae                | 0          | 0              | 0             | 0              | 0           | 0              | 0                 | 0              | 6                                  | 1.00           | 0                        | 0              |
| Corduliidae                   | 1          | 0.25           | 0             | 0              | 0           | 0              | 0                 | 0              | 6                                  | 1.00           | 0                        | 0              |
| <b>Insecta: Heteroptera</b>   |            |                |               |                |             |                |                   |                |                                    |                |                          |                |
| Notonectidae                  | 3          | 0.60           | 0             | 0              | 3           | 0.60           | 0                 | 0              | 0                                  | 0              | 0                        | 0              |
| Corixidae                     | 3          | 1.00           | 0             | 0              | 2           | 0.33           | 2                 | 0.40           | 0                                  | 0              | 0                        | 0              |
| Veliidae                      | 3          | 1.00           | 0             | 0              | 2           | 1.00           | 1                 | 0.25           | 0                                  | 0              | 1                        | 0.50           |
| <b>Insecta: Coleoptera</b>    |            |                |               |                |             |                |                   |                |                                    |                |                          |                |
| Noteridae                     | 0          | 0              | 0             | 0              | 3           | 0.50           | 0                 | 0              | 0                                  | 0              | 0                        | 0              |
| Dytiscidae                    | 0          | 0              | 0             | 0              | 3           | 0.75           | 0                 | 0              | 0                                  | 0              | 0                        | 0              |
| <b>Insecta: Diptera</b>       |            |                |               |                |             |                |                   |                |                                    |                |                          |                |
| Chaoboridae                   | 3          | 1.00           | 0             | 0              | 0           | 0              | 1                 | 0.25           | 0                                  | 0              | 0                        | 0              |
| Culicidae                     | 3          | 1.00           | 0             | 0              | 3           | 1.00           | 2                 | 0.50           | 0                                  | 0              | 1                        | 0.20           |
| Chironomidae                  | 3          | 1.00           | 1             | 0.20           | 0           | 0              | 3                 | 0.75           | 3                                  | 1.00           | 0                        | 0              |
| Limoniidae                    | 1          | 1.00           | 0             | 0              | 3           | 0.75           | 1                 | 0.25           | 0                                  | 0              | 0                        | 0              |

## References

Tachet, H.; Richoux, P.; Bournaud, M.; Usseglio-Polatera, P. *Invertébrés d'eau douce – systématique, biologie, écologie*. CNRS Éditions: Paris, France, **2000**.
