# Supplementary material for: Salinity Affects Freshwater Invertebrate Traits and Litter Decomposition
Source: MDPI journal article supplement (doi:10.3390/d13110599), 2021-11-21
Supplement: s1 [file s1 › Table S2.pdf]

**Table S2.** Statistical results for the variables characterizing initial abiotic and biotic conditions of the mesocosms and of the physicochemical parameters during the 65 days after seawater intrusion. All tests were carried out with the software STATISTICA Version 10.0 (StatSoft, Inc., Tulsa, USA) with the level of significance set at 0.05. In Tukey post-hoc test results, treatments with different superscripts are significantly different. C: Control, 2.0, 3.3, 5.5, 9.3 and 15.3: treatments (mS cm<sup>-1</sup>). NS: non-significant.

| Variables                     | Normality                  | Homoscedasticity             | MANOVA                                                                                                                                     | Tukey                                                                                                                                                  |
|-------------------------------|----------------------------|------------------------------|--------------------------------------------------------------------------------------------------------------------------------------------|--------------------------------------------------------------------------------------------------------------------------------------------------------|
| Abiotic before                |                            | Bartlett's test              |                                                                                                                                            |                                                                                                                                                        |
| Electrical conductivity       | W=0.92, P=0.29             | $\chi^2=1.10$ , P=0.95, df=5 | Treatment: $F_{10,10}=1.90$ , P=0.17<br>Day: $F_{10,10}=1344.89$ , <b>P&lt;0.0001</b><br>Day $\times$ Treatment: $F_{10,10}=0.40$ , P=0.91 |                                                                                                                                                        |
| Dissolved oxygen              | W=0.87, P=0.07             | $\chi^2=2.47$ , P=0.78, df=5 |                                                                                                                                            |                                                                                                                                                        |
| pH                            | W=0.94, P=0.51             | $\chi^2=1.64$ , P=0.90, df=5 |                                                                                                                                            |                                                                                                                                                        |
| ln(Water temperature+1)       | W=0.73, <b>P=0.0015</b>    | $\chi^2=0.06$ , P=0.99, df=5 |                                                                                                                                            |                                                                                                                                                        |
| Biotic before                 |                            |                              |                                                                                                                                            |                                                                                                                                                        |
| Abundance                     | W=0.95, P=0.63             | $\chi^2=4.06$ , P=0.40, df=4 | Treatment: $F_{5,6}=0.92$ , P=0.53                                                                                                         |                                                                                                                                                        |
| Richness                      | W=0.93, P=0.43             | $\chi^2=1.19$ , P=0.88, df=4 | Day: $F_{1,6}=122.73$ , <b>P&lt;0.0001</b><br>Day $\times$ Treatment: $F_{5,6}=1.18$ , P=0.42                                              |                                                                                                                                                        |
| Abiotic after                 |                            | Levene's test                |                                                                                                                                            |                                                                                                                                                        |
| ln(Electrical conductivity+1) | W=0.93, <b>P=0.047</b>     | F=0.74, P=0.60, df=5,22      | Treatment: $F_{0.05,5,22}=113.56$ , <b>P&lt;0.0001</b>                                                                                     | C <sup>a</sup> 2.0 <sup>bc</sup> 3.3 <sup>cd</sup> 5.5 <sup>d</sup> 9.3 <sup>e</sup> 15.3 <sup>f</sup><br>NS: P>0.10<br>Significant: <b>P&lt;0.009</b> |
| ln(Ammonia+1)                 | W=0.81, <b>P&lt;0.0001</b> | F=1.38, P=0.27, df=5,22      | Day: $F_{2,44}=874.98$ , <b>P&lt;0.0001</b>                                                                                                |                                                                                                                                                        |
| ln(Sulphate+1)                | W=0.93, <b>P=0.039</b>     | F=0.69, P=0.63, df=5,22      | Day $\times$ Treatment: $F_{10,44}=6.51$ , <b>P&lt;0.0001</b>                                                                              |                                                                                                                                                        |
| ln(Dissolved oxygen+1)        | W=0.96, P=0.56             | F=1.67, P=0.17, df=5,18      | Treatment: $F_{5,18}=0.53$ , P=0.75<br>Day: $F_{3,54}=1922.87$ , <b>P&lt;0.0001</b><br>Day $\times$ Treatment: $F_{15,54}=1.10$ , P=0.38   |                                                                                                                                                        |
| ln(pH+1)                      | W=0.91, <b>P=0.005</b>     | F=0.43, P=0.82, df=5,18      |                                                                                                                                            |                                                                                                                                                        |
| ln(Nitrate+1)                 | W=0.98, P=0.68             | F=1.85, P=0.15, df=5,18      |                                                                                                                                            |                                                                                                                                                        |
| Phosphate                     | W=0.95, P=0.08             | F=0.63, P=0.61, df=5,18      |                                                                                                                                            |                                                                                                                                                        |
