# Supplementary material for: Salinity Affects Freshwater Invertebrate Traits and Litter Decomposition
Source: MDPI journal article supplement (doi:10.3390/d13110599), 2021-11-21
Supplement: s1 [file s1 › Table S3.pdf]

Supplementary materials

**Table S3.** Identity and abundance of the invertebrates colonizing the leaf litter (total number per day, sum of three leaf packs) in each of the treatments during the study period. C=control; 2.0, 3.3, 5.5, 9.3 and 15.3=treatments (mS cm<sup>-1</sup>). FFG=functional feeding group.

| Taxa                          | FFG                 | Day 16 (13/12/2013) |     |     |     |     |      | Day 63 (22/01/2014) |     |     |     |     |      |
|-------------------------------|---------------------|---------------------|-----|-----|-----|-----|------|---------------------|-----|-----|-----|-----|------|
|                               |                     | C                   | 2.0 | 3.3 | 5.5 | 9.3 | 15.3 | C                   | 2.0 | 3.3 | 5.5 | 9.3 | 15.3 |
| Cladocera                     | Filtering-collector | 0                   | 0   | 0   | 0   | 0   | 0    | 0                   | 1   | 0   | 2   | 0   | 0    |
| Copepoda                      | Filtering-collector | 0                   | 0   | 0   | 0   | 0   | 0    | 0                   | 5   | 0   | 2   | 0   | 0    |
| Ostracoda                     | Filtering-collector | 0                   | 0   | 0   | 0   | 0   | 0    | 2                   | 8   | 5   | 17  | 4   | 6    |
| <b>Gastropoda</b>             |                     |                     |     |     |     |     |      |                     |     |     |     |     |      |
| Physidae                      | Scraper             | 0                   | 1   | 0   | 0   | 0   | 0    | 3                   | 3   | 1   | 0   | 0   | 0    |
| <b>Acari</b>                  |                     |                     |     |     |     |     |      |                     |     |     |     |     |      |
| Hydracarina                   | Predator            | 0                   | 0   | 0   | 0   | 0   | 0    | 0                   | 0   | 0   | 1   | 0   | 0    |
| <b>Insecta: Ephemeroptera</b> |                     |                     |     |     |     |     |      |                     |     |     |     |     |      |
| Baetidae                      | Gathering-collector | 1                   | 0   | 0   | 0   | 0   | 1    | 0                   | 2   | 0   | 0   | 0   | 0    |
| Caenidae                      | Gathering-collector | 0                   | 0   | 0   | 0   | 0   | 0    | 0                   | 0   | 1   | 0   | 0   | 0    |
| <b>Insecta: Odonata</b>       |                     |                     |     |     |     |     |      |                     |     |     |     |     |      |
| Corduliidae                   | Predator            | 7                   | 12  | 23  | 3   | 6   | 18   | 6                   | 10  | 5   | 0   | 3   | 0    |
| Coenagrionidae                | Predator            | 8                   | 2   | 9   | 11  | 4   | 0    | 2                   | 6   | 1   | 7   | 5   | 2    |
| <b>Insecta: Coleoptera</b>    |                     |                     |     |     |     |     |      |                     |     |     |     |     |      |
| Dytiscidae                    | Predator            | 1                   | 1   | 0   | 0   | 1   | 0    | 0                   | 0   | 2   | 1   | 0   | 1    |
| <b>Insecta: Diptera</b>       |                     |                     |     |     |     |     |      |                     |     |     |     |     |      |
| Chironomidae                  | Gathering-collector | 1                   | 0   | 0   | 0   | 0   | 1    | 6                   | 7   | 5   | 18  | 18  | 14   |
