# Supplementary material for: Salinity Affects Freshwater Invertebrate Traits and Litter Decomposition
Source: MDPI journal article supplement (doi:10.3390/d13110599), 2021-11-21
Supplement: s1 [file s1 › Table S4.pdf]

## Supplementary materials

before seawater intrusion to assess similarity of the mesocosms. Color: samples collected after seawater intrusion.

[illegible]
